# Supplementary material for: Role of MXD3 in Proliferation of DAOY Human Medulloblastoma Cells
Source: PLoS One. 2012 Jul 10;7(7):e38508. doi: 10.1371/journal.pone.0038508 (PMC3393725; doi:10.1371/journal.pone.0038508)
Supplement: Table S1 — MXD3 target genes and expression profiles. *Genes in this list were selected from ChIP-chip results based on the following criteria: peak values >3 in at least one biological replicate and/or peak values >2 in both biological replicates. Mxd3 targets that were validated by PCR with an independent ChIP sample are highlighted in yellow. ¶ChIP 1 and ChIP 2 represent the peak values of two biologically independent experiments and are calculated from promoter array signals using the Max4 algorithm. Significant peak values are highlighted in blue (>3) or light blue (>2). &Expression profile values represent fold increase in mRNA abundance calculated as in Table 1. Based on the criteria described in the Results section, upregulated genes are highlighted in red and downregulated genes are highlighted in green. N/A indicates genes not present on the array platform used. (XLS) [file pone.0038508.s004.xls]

## Sheet: Sheet1
Gene name*	Accession	ChIP 1¶	ChIP 2¶	Expression profile (Mad3/Ctrl)&
C10orf120	NM_001010912	3.05	3.5275	n/a
hypothetical protein	BC101384	3	1.61	n/a
NA	NM_006697	2.835	0.485	n/a
NA	NM_133176	2.6575	1.5975	n/a
FLJ42418	NM_001001695	3.42	0.845	n/a
OR4X1	NM_001004726	0.68	3.3625	n/a
OR5D14	NM_001004735	1.68	3.7425	n/a
DGKK	NM_001013742	2.995	0.68	n/a
PCDH12	NM_016580	1.69	4.2375	546.745
MIXL1	NM_031944	2.855	1.36	37.0526
KCNK18	NM_181840	0.435	3.3	25.9931
FLJ42842	NM_001004335	0.7575	3.8575	24.929
BNIPL	NM_138279	2.0375	2.7175	16.0598
ALDH8A1	NM_170771	0.24	3.08	11.2047
LRRC29	NM_001004055	2.2175	3.3025	10.1765
FLJ42258	NM_001004327	0.3025	3.755	9.20027
HEATR1	NM_018072	2.7225	2.905	8.21364
GPR23	NM_005296	0.67	3.035	7.5612
DEFA3	NM_005217	2.905	2.0275	7.51114
SPRR4	NM_173080	0.79	3.025	6.52741
DBC1	NM_014618	2.135	3.56	6.52368
CXCL13	NM_006419	2.8475	0.04	5.80524
SNRK	NM_017719	2.185	2.22	5.04972
CNGA4	NM_001037329	1.715	4.9025	5.03449
OR2AE1	NM_001005276	1.455	3.1775	4.8807
SERPINB10	NM_005024	0.025	3.05	4.78611
SLC6A12	NM_003044	1.125	3.4925	4.75788
C14orf166B	NM_194287	0	3.42	4.34217
RP110	NM_001013687	3.04	0.07	4.33422
OR6N1	NM_001005185	2.5	2.575	4.10861
OR9G9	NM_001013358	1.1825	3.1625	3.98309
NA	NM_001007238	2.645	2.9675	3.94513
POU3F4	NM_000307	2.8575	0.8025	3.80532
ADH1A	NM_000667	1.3925	3.985	3.77297
FBXL22	NM_203373	0.9625	3.375	3.74925
CCDC105	NM_173482	2.6875	0.83	3.70314
LOC285033	NM_001037228	0.8675	3.3475	3.69443
LL22NC010	NM_178552	1.6375	3.1125	3.68958
GSTA2	NM_000846	0.905	3.8175	3.64206
TP53INP1	NM_033285	0.435	3.2075	3.62833
IRF4	NM_002460	1.0275	3.775	3.60305
GPR101	NM_054021	3.255	0.95	3.50075
OR4C12	NM_001005270	1.58	3.2675	3.30984
PANK1	NM_148977	2	2.0675	3.27695
PKX2	NM_022062	0.715	3.2275	3.22119
LOC200420	NM_145300	2.125	2.2725	3.04255
LMO3	NM_001001395	3.0725	1.3	3.03858
CASQ1	NM_001231	1.0375	4.115	2.96651
WDR52	NM_018338	0.9775	3.9375	2.92101
FLJ40172	NM_173649	0.46	3.33	2.87144
DNAJC3	NM_006260	3.0325	0.5925	2.76965
RUNX1T1	NM_175635	0.1725	3.7	2.76556
PREX1	NM_020820	2.875	2.375	2.71514
MYH7	NM_000257	1.34	3.1825	2.70458
APOD	NM_001647	0.9525	4.085	2.6044
CMTM5	NM_138460	1.1875	3.035	2.55885
MC2R	NM_000529	3.4825	0.4625	2.55427
MYO7A	NM_000260	2.92	0.5525	2.47855
ABHD2	NM_152924	2.8425	0.175	2.45158
CX36	NM_020660	2.195	3.0625	2.42887
CYP2F1	NM_000774	0.285	4.145	2.41836
FLJ37543	NM_173667	0	3.3325	2.37347
NR6A1	NM_033335	2.6475	0.635	2.35742
LRP1B	NM_018557	1.475	3.1875	2.33787
TMEM112	NM_022773	0.56	3.24	2.30241
GARNL3	NM_032293	0	3.4675	2.27933
GRRP1	NM_024869	1.06	3.345	2.25722
CNN1	NM_001299	2.7175	0.8025	2.24238
NA	NM_138416	1.3175	3.1	2.20786
PLSCR2	NM_020359	3.1225	1.61	2.18326
TMEFF2	NM_016192	0.6875	4.355	2.16453
NPC1L1	NM_013389	2.0425	2.535	2.16118
GRIN2A	NM_000833	2.9825	1.25	2.15155
NIN	NM_182944	3.23	1.1625	2.14251
MCOLN1	NM_020533	1.1925	2.975	2.11996
SAA2	NM_030754	0.82	3.01	2.11579
PLIN	NM_002666	0.9825	3.8575	2.11542
DEC1	NM_017418	0.475	4.6675	2.11154
CETP	NM_000078	0	3.31	2.10773
C11orf1	NM_022761	2.94	0.895	2.10626
HIST1H2BJ	NM_021058	1.84	3.39	2.10113
KIAA0319	NM_014809	2.7575	0.3775	2.06906
OSBPL11	NM_022776	2.765	1.3325	2.05747
CCDC60	NM_178499	0.955	3.3025	2.02226
KIF5A	NM_004984	1.49	3.9	2.02175
CTSE	NM_148964	2.195	2.465	2.00019
CARD11	NM_032415	0.6275	4.19	2.00015
EDN1	NM_001955	3.3675	0.6625	1.99223
LOC401286	NM_001023565	0.8175	3.55	1.98961
HMP19	NM_015980	2.8525	1.805	1.96562
EPHA1	NM_005232	0.985	3.195	1.9576
NUMA1	NM_006185	3.4575	1.13	1.94816
MGC52498	NM_182621	0.44	3.025	1.93825
X3	NM_015718	0.94	2.99	1.91254
METTL1	NM_005371	2.7725	1.4625	1.89592
PRAMEF4	NM_001009611	1.5325	3.2175	1.89463
GPR1	NM_005279	2.7975	0.23	1.87603
ARHGEF9	NM_015185	0.585	3.6375	1.87423
TBC1D21	NM_153356	1.3475	3.8275	1.86513
C20orf114	NM_033197	1.5075	3.8575	1.86325
PGDS	NM_014485	1.985	2.0125	1.85516
FLJ41170	NM_001004332	1.7675	3.695	1.84079
CCRN4L	NM_012118	2.1625	2.8125	1.83705
VPS33B	NM_018668	2.7525	0.6775	1.83306
BMP3	NM_001201	0.5175	3.465	1.83105
PRLH	NM_015893	1.235	4.8075	1.81999
C20orf133	NM_080676	1.09	3.735	1.81715
SETMAR	NM_006515	1.8425	3.555	1.8069
ZNF577	NM_032679	2.935	2.535	1.79839
C21orf63	NM_058187	2.8025	1.0225	1.77992
PCSK6	NM_138322	2.7625	0.47	1.76646
KRT36	NM_003771	0.84	3.365	1.7608
OR52B2	NM_001004052	3.075	0.105	1.75854
C15orf45	NM_001035530	0.9775	4.935	1.74581
GATA1	NM_002049	2.165	2.395	1.72877
GPR4	NM_005282	2.2275	3.2375	1.72766
CAMKK1	NM_172207	3.3425	1.1275	1.72546
MGC26694	NM_178526	3.585	3.1	1.71701
ZSCAN2	NM_181877	2.97	0.26	1.71332
GORASP1	NM_031899	2.96	0.89	1.69972
ABT1	NM_013375	2.95	0.4525	1.67892
TTC30B	NM_152517	3.7375	0.58	1.67616
KIAA0523	NM_015253	1.7075	3.1025	1.67593
PRKCG	NM_002739	2.9375	0.6725	1.6699
NAV1	NM_020443	0.465	3.05	1.66484
C6orf134	NM_001031722	2.585	3.53	1.66077
ANKRD13B	NM_152345	2.16	2.29	1.6538
NA	NM_001001680	2.9875	1.11	1.64549
SLCO5A1	NM_030958	0.9475	4.4375	1.63552
CPNE1	NM_003915	1.175	3.055	1.63
LY6G5B	NM_021221	2.4675	2.715	1.6264
ZAR1	NM_175619	0.4625	3.0175	1.61759
C1orf62	NM_152763	1.305	4.025	1.61431
GALNT8	NM_017417	1.045	3.3375	1.61315
OR4K13	NM_001004714	1.5275	3.085	1.61036
LOC387911	NM_001007537	0.275	3.41	1.61015
HTR1B	NM_000863	1.73	5.175	1.60506
ARX	NM_139058	0.1225	4.395	1.60265
C17orf65	NM_178542	2.655	0.395	1.59322
LIMK2	NM_016733	2.4975	3.675	1.58209
ESX1	NM_153448	2.715	0.4375	1.58041
MDN1	NM_014611	2.0875	2.665	1.57137
ERCC8	NM_001007234	2.8125	0.44	1.5616
COL12A1	NM_080645	2.79	1.4575	1.56095
OXA1L	NM_005015	3.095	3.1775	1.55395
DEFB129	NM_080831	0.7225	2.9875	1.55104
C20orf51	NM_022099	3.1875	0	1.54463
GAS2	NM_177553	2.03	3.5625	1.5443
CUEDC1	NM_017949	1.88	3.6325	1.54101
FLJ35220	NM_173627	2.9875	1.2625	1.53898
DPP3	NM_130443	2.3	3.04	1.53581
GPR116	NM_015234	2.1925	2.155	1.52972
PDGFRB	NM_002609	1.3125	3.325	1.52939
BTN3A2	NM_007047	2.71	3.1475	1.5219
SLCO1C1	NM_017435	2.9125	1.955	1.52021
FKBP9L	NM_182827	0.5425	3.6625	1.50959
TMEM129	NM_138385	0.555	3.3225	1.5095
GPR85	NM_018970	2.8175	0.0125	1.50739
ZNF311	NM_001010877	3.185	0.3225	1.49963
LRRN5	NM_201630	2.75	1.04	1.49518
TNS4	NM_032865	0.62	4.055	1.49293
KIAA1967	NM_021174	1.4025	3.8975	1.48872
AP3M1	NM_207012	0.415	3.71	1.48199
EVX1	NM_001989	0.3725	3.48	1.48183
ANGEL1	NM_015305	2.025	3.075	1.47869
DEGS2	NM_206918	1.6825	2.9825	1.47234
SIPA1L2	NM_020808	0.2375	3.49	1.46996
CRMP1	NM_001014809	2.845	1.6225	1.46929
RGS13	NM_144766	0.6825	3.3375	1.45853
ABCA2	NM_212533	1.535	3.1375	1.45456
SATL1	NM_001012980	2.27	3.9775	1.44718
NPC2	NM_006432	1.6175	3.07	1.4461
CCDC121	NM_024584	2.97	1.1475	1.442
ASCL2	NM_005170	1.4675	3.9575	1.44127
RNASE10	NM_001012975	0.5175	3.73	1.43731
BPIL1	NM_025227	2.2325	3.525	1.43718
JMJD2B	NM_015015	2.98	0.58	1.43457
CST9	NM_001008693	2.8675	3.635	1.43325
TBX3	NM_016569	3.1075	0.4325	1.42551
LACRT	NM_033277	0.475	3.2775	1.42522
LRRK1	NM_024652	1.43	3.825	1.42398
PCYT1A	NM_005017	3.8225	0.56	1.41356
NEU1	NM_000434	2.8475	0.35	1.40707
OR51G2	NM_001005238	2.5925	2.3175	1.40691
ZNF452	NM_052923	3.535	1.0075	1.40615
C17orf49	NM_174893	2.1	2.23	1.40359
GDI1	NM_001493	1.995	4.8575	1.39639
MAGED1	NM_001005332	1.99	2.1025	1.396
RYR2	NM_001035	0.4225	3.3125	1.39548
MAP3K9	NM_033141	1.7875	4.385	1.39536
ZNF197	NM_006991	2.6625	0.5225	1.38899
FCAMR	NM_032029	0.5725	3.145	1.38855
SCFD2	NM_152540	3.145	3.08	1.38703
C14orf159	NM_024952	2.605	3.315	1.38687
SLC3A2	NM_002394	2.98	0.8575	1.38639
DKFZp434N035	NM_032262	1.07	3.5525	1.38156
GCK	NM_000162	1.245	3.99	1.38012
CXCL5	NM_002994	2.895	0.65	1.38005
HMGB4	NM_001008728	2.875	0.245	1.37211
ITPR2	NM_002223	0.3575	3.3	1.36938
MAGED4	NM_177537	3.5975	1.22	1.36906
SOX4	NM_003107	1.6525	3.0675	1.36905
TUSC4	NM_006545	2.785	0.72	1.36309
C6orf106	NM_024294	3.0875	0.9375	1.36249
MED19	NM_153450	3.8475	0.5	1.36191
SLC9A6	NM_006359	0.125	4.48	1.35682
TNC	NM_002160	2.795	0.705	1.3546
DNAJC18	NM_152686	1.965	2.88	1.34124
GPT2	NM_133443	3.7225	0.4375	1.34121
RP110	NM_173859	2.0275	3.3425	1.34077
NPM3	NM_006993	0.9425	4.57	1.33699
PTRH2	NM_016077	2.8125	0.3575	1.33629
MRPS21	NM_031901	2.9075	1.97	1.33239
PWP1	NM_007062	2.85	1.4425	1.3301
CD81	NM_004356	2.7025	0.83	1.32827
ULK2	NM_014683	0.3275	3.59	1.32548
PROP1	NM_006261	0.3075	3.0275	1.32187
EPS8L1	NM_017729	0.64	4.0625	1.31813
MGC70870	NM_203481	1.9525	2.5525	1.31537
GPATC2	NM_018040	4.0075	0	1.31475
C5orf13	NM_004772	0.165	3.6175	1.31424
EDG1	NM_001400	2.595	3.02	1.31091
RNF168	NM_152617	2.6825	0.7525	1.31056
RPL3	NM_001033853	3.2075	0.635	1.3096
INSIG1	NM_198337	0.9175	4.3975	1.307
HLA0	NM_005514	1.025	3.675	1.30589
RAPGEF3	NM_006105	1.045	4.3725	1.30582
ZNF502	NM_033210	2.7425	1.365	1.303
AMPD2	NM_004037	2.855	0.315	1.30233
CHCHD6	NM_032343	3.125	0.37	1.30131
CBWD2	NM_172003	2.94	0.005	1.3001
CHMP2A	NM_014453	3.0175	0.835	1.2981
ZFAND1	NM_024699	0.8325	3.8825	1.29534
MAGEE2	NM_138703	0	3.6475	1.2938
KIFAP3	NM_014970	2.7775	1.0875	1.2934
HK2	NM_000189	2.2375	2.595	1.29297
EARS2	NM_133451	2.375	3.2675	1.29232
KATNB1	NM_005886	2.74	0.4425	1.29016
MTHFD1	NM_005956	4.165	0.6425	1.28977
ASPH	NM_032468	0.44	3.48	1.28876
FLJ34503	NM_001039528	2.18	2.1725	1.28648
SNW1	NM_012245	0.36	2.9675	1.28615
CSNK2A1	NM_177560	2.8	0.33	1.28607
PYCRL	NM_023078	1.6375	2.985	1.28539
ARL4C	NM_005737	0.85	3.0625	1.28145
MRPL43	NM_032112	3.695	1.6425	1.27989
PHB2	NM_007273	2.77	0.4225	1.27981
PSME2	NM_002818	3.445	0.8325	1.27589
OR1L3	NM_001005234	1.7575	3.29	1.27487
ARF5	NM_001662	3.02	1.54	1.274
EPS8L1	NM_139204	2.7	0.9425	1.27379
CRAT	NM_144782	2.7475	3.4675	1.27276
LHX1	NM_005568	2.94	0.7325	1.27269
C19orf56	NM_016145	0.6575	3.62	1.27169
C8orf51	NM_024035	1.8125	3.165	1.27134
CMYA1	NM_194293	0.8725	3.1325	1.27082
RPL4	NM_000968	2.845	1.34	1.27029
FLJ11184	NM_018352	2.68	0.8775	1.26982
CRADD	NM_003805	2.7575	1.585	1.26756
UQCRQ	NM_014402	0.945	3.19	1.26075
SFTPD	NM_003019	0.25	3.22	1.26033
CTH	NM_153742	3.1775	0.62	1.26019
IREB2	NM_004136	4.045	0.45	1.26003
C11orf59	NM_017907	0.6525	3.4825	1.25969
RFT1	NM_052859	2.91	1.1175	1.25895
TBC1D15	NM_022771	2.3175	3.73	1.25794
CCDC28A	NM_015439	3.59	0.5975	1.25752
MRPL24	NM_145729	3.9575	1.815	1.25597
NCOA3	NM_181659	2.7975	1.005	1.2552
C6orf153	NM_033112	2.0525	2.7875	1.25363
DIO1	NM_213593	0.22	4.32	1.253
JOSD3	NM_024116	2.7175	1.18	1.25183
KCNJ15	NM_170737	1.37	2.965	1.24983
SLC8A3	NM_183002	1.6825	3.455	1.24929
SLC4A2	NM_003040	1.78	3.6475	1.24848
CIP29	NM_033082	1.5325	3.915	1.24829
ESPL1	NM_012291	2.8	1.375	1.24772
FECH	NM_001012515	0.88	3.09	1.24565
CXXC5	NM_016463	1.2925	3.095	1.24399
GRB10	NM_001001550	3.06	1.875	1.24374
DKC1	NM_001363	2.8625	0.845	1.24343
PIGS	NM_033198	2.7175	0.605	1.24212
ZNF71	NM_021216	1.055	3.28	1.24207
FAM104A	NM_032837	2.7875	1.2	1.24089
C1orf107	NM_014388	2.7725	1.815	1.23785
IRF3	NM_001571	0.7875	3.1475	1.23558
KLF13	NM_015995	2.765	0.79	1.23507
MAD2L1BP	NM_014628	2.955	0.8675	1.23448
GAS2L1	NM_152237	2.4825	3.32	1.23364
PUS7L	NM_031292	2.935	2.835	1.23267
GOSR1	NM_004871	2.7125	1.955	1.23178
DPAGT1	NM_203316	4.3175	0.4625	1.23045
DYNLL2	NM_080677	2.7425	0.8825	1.22937
C20orf12	NM_018152	2.5575	2.435	1.2282
ZNF395	NM_018660	3.015	0.895	1.22818
HIST1H3E	NM_003532	0.5675	3.57	1.2278
OR10J3	NM_001004467	1.605	4.7375	1.22766
ISG20L2	NM_030980	3.09	0.6475	1.22675
POLDIP2	NM_015584	2.8275	2.0125	1.22646
MPV17	NM_002437	2.33	3.21	1.22442
ATP1B1	NM_001677	2.8275	0.7825	1.22381
ZFHX1B	NM_014795	2.6725	0.1725	1.22335
C17orf45	NM_152350	3.545	0.4675	1.22288
GPR177	NM_024911	2.665	0.8475	1.22239
UNQ1940	NM_205855	3.145	0.4775	1.2223
LOC112703	NM_138411	2.1875	3.59	1.22178
KCNT2	NM_198503	2.3025	2.745	1.22121
MECP2	NM_004992	3.435	0.83	1.22001
ATG9A	NM_024085	3.3425	0.615	1.21814
PLK2	NM_006622	2.7175	1.185	1.21765
TMEM59	NM_004872	2.775	1.26	1.21706
TAF6	NM_139123	2.6525	0.545	1.21598
AFTPH	NM_203437	2.6825	0.7075	1.21597
RPL12	NM_000976	3.2775	0.79	1.21584
SRP54	NM_003136	1.8575	3.0775	1.21576
CBWD5	NM_001024916	2.7875	0.3025	1.2152
WARS	NM_213645	2.0275	2.975	1.21399
LCMT2	NM_014793	2	2.225	1.21264
CDK5RAP1	NM_016408	2.615	0.6675	1.21223
NDN	NM_002487	1.725	3.9225	1.21168
HSP90AB1	NM_007355	3.6875	0.7575	1.21165
CGREF1	NM_006569	2.03	2.2375	1.21016
YIPF3	NM_015388	2.69	0.9475	1.20988
MEIS1	NM_002398	2.6975	1.005	1.20915
LIPE	NM_005357	2.2575	2.1325	1.209
DLG7	NM_014750	2.71	0.185	1.20776
SMAD1	NM_001003688	2.89	0.56	1.20744
DUT	NM_001948	1.0075	4.29	1.20638
MAX	NM_145114	2.7325	1.4125	1.20569
SLC38A2	NM_018976	0.6525	3.9375	1.20388
EXOC5	NM_006544	1.4425	2.995	1.20078
MUT	NM_000255	3.49	0.74	1.19857
TARS	NM_152295	3.6725	1.0775	1.19853
ZNF334	NM_199441	2.185	2.8775	1.19762
NGRN	NM_016645	0.165	2.97	1.19707
CLUAP1	NM_024793	1.5025	3.6525	1.19635
MIF	NM_002415	1.37	3.67	1.19606
MAPK8IP2	NM_016431	0.5875	3.4775	1.19588
COG4	NM_015386	2.8225	0.8825	1.1955
SPATA13	NM_153023	0.42	3.255	1.19388
PSMA5	NM_002790	2.8075	0.8625	1.19333
CGI0	NM_016052	3.2625	0.5825	1.19287
ANKS1B	NM_181670	2.7125	0.44	1.19287
RAB5C	NM_201434	3.0225	1.015	1.19286
ARFIP2	NM_012402	2.85	0.7075	1.19128
C14orf133	NM_022067	3.81	2.4675	1.19088
FTH1	NM_002032	2.2	3.1425	1.18928
TRIM38	NM_006355	1.2475	3.2925	1.18725
ROBO3	NM_022370	3.2	0.405	1.18687
MKKS	NM_170784	2.2825	2.0525	1.18581
EIF3S6	NM_001568	3.0975	0.2925	1.18503
LY6E	NM_002346	2.935	2.43	1.18471
BDNF	NM_170731	1.055	3.1	1.18445
MRPS28	NM_014018	2.48	3.6175	1.18404
ELMO1	NM_130442	3.055	0.6575	1.18385
ZDHHC24	NM_207340	1.9825	2.235	1.18297
CPXM2	NM_198148	2.7675	0.5775	1.1808
C9orf165	NM_198573	3.48	3.625	1.18011
FNBP1L	NM_017737	0.1025	3.49	1.17856
ALOX15B	NM_001141	0.775	3.65	1.17847
SH3GLB1	NM_016009	0.3425	3.05	1.17727
RIOK2	NM_018343	3.0525	0.6025	1.17713
FLJ13305	NM_032180	2.725	1.1425	1.1769
ALKBH1	NM_001039506	2.72	0.1875	1.17633
LPHN1	NM_014921	2.8325	1.3475	1.17541
CIZ1	NM_012127	1.3825	3.1775	1.17529
PSMB3	NM_002795	3.2925	0.2925	1.17313
ARHGEF1	NM_199002	2.7625	1.3075	1.17247
TM4SF1	NM_014220	1.3875	3.6875	1.16848
FAM111B	NM_198947	1.7	3.465	1.16583
NA	NM_181301	0.355	3.4575	1.16536
WWP1	NM_007013	2.85	0.8975	1.16377
MIDN	NM_177401	0.815	3.2275	1.16357
PSMA2	NM_002787	2.395	3.115	1.16354
TRIM54	NM_187841	2.835	2.69	1.16339
TAL2	NM_005421	1.0625	3.91	1.15973
WDR46	NM_005452	3.3825	0.715	1.15924
FBL	NM_001436	3.1775	2.7775	1.15855
BTN2A1	NM_078476	2.06	3.3475	1.15746
CCDC100	NM_153223	0.785	3.015	1.1572
C20orf23	NM_024704	1.9675	2.1275	1.15683
GUF1	NM_021927	3.1325	1.525	1.1566
FKBP8	NM_012181	0.8325	4.2	1.15594
TAX1BP1	NM_006024	3.2475	1.185	1.15426
OSGEP	NM_017807	2.7075	1.7525	1.15417
CSMD3	NM_198123	3.2775	0.26	1.15347
PEX7	NM_000288	0.5375	4.285	1.15298
SEMA7A	NM_003612	2.82	0.85	1.15203
C8orf78	NM_182525	0.9825	3.2225	1.15153
SURB7	NM_004264	2.345	2.865	1.15096
TPM1	NM_001018008	3.3625	0.855	1.15096
C1RL	NM_016546	3.155	0.94	1.14903
BRD8	NM_183359	2.655	0.5425	1.14851
KCNH1	NM_172362	4.3	0.42	1.14809
ADCK4	NM_024876	2.8775	2.095	1.14767
CETN2	NM_004344	4.0425	0.3975	1.14738
NEGR1	NM_173808	3.095	0.655	1.14717
RNF180	NM_178532	1.2675	3.0675	1.14692
DCTN4	NM_016221	3.15	1.78	1.14516
MCM7	NM_005916	3.36	0.4	1.14471
POLD1	NM_002691	2.85	0.7325	1.14377
PTGFRN	NM_020440	3.3475	0.95	1.14288
PSMB10	NM_002801	1.3475	3.17	1.14269
CCDC22	NM_014008	1.875	3.4375	1.14258
PTPRN2	NM_130843	0.7125	2.9675	1.142
ACCN1	NM_001094	0.955	3.7875	1.14172
VARSL	NM_020442	0.5125	4.735	1.14169
C11orf39	NM_207432	1.985	2.9475	1.14017
TRAF3IP2	NM_147686	3.055	0.725	1.14
TIMM8B	NM_012459	2.0975	3.7475	1.13788
FLJ20551	NM_017875	1.3225	3.21	1.13767
PIGM	NM_145167	2.955	1.615	1.13536
WDR5B	NM_019069	2.9125	1.005	1.13507
TRIM11	NM_145214	0.6625	3.59	1.13482
ANXA4	NM_001153	3.1625	0.965	1.13363
RPL9	NM_000661	3.905	1.4875	1.13359
TIMM23	NM_006327	2.4025	2.0225	1.1324
WBP11	NM_016312	0.6925	3.555	1.13154
ST8SIA5	NM_013305	0.155	3.0075	1.13151
MGC11257	NM_032350	0.39	3.52	1.13111
WBP4	NM_007187	3.0925	1.695	1.13031
SH3KBP1	NM_031892	4.4775	1.6085	1.12987
YBX1	NM_004559	2.8325	0.5375	1.12968
KCNN4	NM_002250	2.715	1.5925	1.12864
CCDC41	NM_016122	2.6	3.0325	1.12807
TRUB2	NM_015679	4.0075	1.0575	1.12783
ANKRD1	NM_014391	0.555	3.5475	1.12723
PLGLB1	NM_001032392	2.2325	2.9625	1.12718
S100A16	NM_080388	3.415	0.965	1.12656
SLC2A13	NM_052885	2.705	0.41	1.12572
C12orf35	NM_018169	0.02	3.4175	1.12556
BSCL2	NM_032667	2.19	2.6625	1.12485
CNIH3	NM_152495	3.0725	0.4425	1.12243
MTFR1	NM_014637	4.025	0.54	1.12235
SERPINA1	NM_001002236	2.105	2.605	1.12227
HOXA9	NM_152739	0.155	3.675	1.12217
EPHA7	NM_004440	3.9425	0.8225	1.12159
GFM2	NM_170681	2.9775	0.575	1.12123
TRMT5	NM_020810	2.985	0.77	1.11836
LRRC16	NM_017640	2.3075	2.1925	1.11822
TMEM147	NM_032635	0.505	3.5175	1.11718
HSPC142	NM_014173	3.3325	0.4075	1.11605
PLXNA2	NM_025179	2.165	2.975	1.11602
SF3B2	NM_006842	0.785	3.405	1.11553
C14orf124	NM_020195	1.2275	3	1.1154
OR5BU1	NM_001004734	1.6925	4.6125	1.1152
C12orf49	NM_024738	3.1425	0.26	1.11079
RPL38	NM_000999	0.9275	3.0425	1.11068
BGN	NM_001711	0.4225	3.81	1.11049
ZNF792	NM_175872	2.6375	3.34	1.10963
ILKAP	NM_176799	2.295	2.6075	1.10938
TM9SF2	NM_004800	2.9	0.765	1.10928
TBC1D10B	NM_015527	4.16	0.9625	1.10913
RTN4IP1	NM_032730	3.1725	0.11	1.1084
FKBP3	NM_002013	2.5125	4.125	1.10763
WDR75	NM_032168	3.1025	0.1475	1.10647
ATP4A	NM_000704	1.2925	3.01	1.10613
LOC440570	NM_001013708	0.595	3.215	1.10598
CPT1B	NM_152245	1.4775	3.4825	1.10568
SIM1	NM_005068	1.38	5.31	1.1051
TDRD1	NM_198795	0.25	3.1075	1.1034
HSPC111	NM_016391	3.7	0.6925	1.09999
ADAM23	NM_003812	2.295	2.0725	1.09985
FAM62B	NM_020728	0.78	2.9475	1.0984
PVALB	NM_002854	2.9925	3.1125	1.09654
CACNG7	NM_031896	1.0475	4.725	1.0964
BRD9	NM_023924	2.2675	3.92	1.09604
LRRC37B	NM_052888	1.305	3.345	1.09585
PMP22	NM_000304	2.5675	2.4275	1.09387
ZBTB41	NM_194314	2.805	0.84	1.09236
SLC43A3	NM_017611	1.215	3.1275	1.09233
ZNF623	NM_014789	2.2625	2.5125	1.09217
LSS	NM_002340	2.675	1.1525	1.09166
KIAA1683	NM_025249	0.7575	3.23	1.09133
PIK3R4	NM_014602	3.415	0.865	1.09129
EIF3S5	NM_003754	2.245	2.02	1.09013
REEP1	NM_022912	0.37	4.42	1.09
SRM	NM_003132	1.3525	3.185	1.08919
FTSJ3	NM_017647	2.3025	2.3575	1.0888
BCL11A	NM_022893	0.69	3.6775	1.08827
DLC1	NM_024767	2.8475	0.055	1.08679
ATP6V0A2	NM_012463	0.215	3.2475	1.08646
VPS37B	NM_024667	3.495	0.25	1.08643
ZNF462	NM_021224	2.9425	0.535	1.08454
C6orf173	NM_001012507	2.31	3.175	1.08405
TMPRSS11F	NM_207407	2.8425	1.305	1.08353
LOC158381	NM_001029857	1.7225	3.48	1.0832
MYNN	NM_018657	2.8175	0.5475	1.08182
MYL4	NM_002476	1.125	3.0725	1.0815
PPP1R10	NM_002714	3.04	0.3625	1.08123
ZNF587	NM_032828	1.365	3.515	1.08033
NA	NM_001001873	1.2325	3.045	1.07909
TMEM65	NM_194291	0.5575	3.1175	1.07897
PTMS	NM_002824	1.295	3.4625	1.07765
C12orf11	NM_018164	3.3325	0.5925	1.07746
CD5L	NM_005894	1.4675	3.735	1.0768
39340	NM_203341	3.495	0.715	1.07578
CABLES1	NM_138375	2.7275	0.3375	1.07473
ST3GAL4	NM_006278	0.535	3.41	1.07435
FLJ42133	NM_001001690	0.45	3.5425	1.07231
DDX24	NM_020414	2.145	2.7325	1.07115
DUSP12	NM_007240	2.03	2.4475	1.07009
KLHDC8B	NM_173546	2.7475	1.61	1.06888
ZNF226	NM_001032375	3.95	0.0425	1.06768
KCNC4	NM_001039574	0.745	3.0125	1.0664
MRAS	NM_012219	0.4775	3.3425	1.0658
ZNF608	NM_020747	2.6475	0.9525	1.06562
KPNA4	NM_002268	3.405	0.8975	1.06443
SNX8	NM_013321	2.7525	1.01	1.06194
CLDN11	NM_005602	2.6575	0.48	1.06152
NA	NM_017804	3.19	0.7675	1.05938
NUFIP1	NM_012345	2.1025	2.96	1.05877
CCDC97	NM_052848	2.9775	0.3775	1.05791
CDC6	NM_001254	3.41	0.09	1.05647
CORO2A	NM_003389	1.315	3.4075	1.0564
TROAP	NM_005480	1.675	3.2725	1.05581
PDGFRL	NM_006207	2.0825	3.44	1.05516
FAM72A	NM_207418	3.285	1.185	1.05421
SHROOM1	NM_133456	2.6575	1.305	1.05257
PISD	NM_014338	0.99	4.8925	1.05226
FLJ10490	NM_018111	2.705	0.8825	1.05205
ZNF766	NM_001010851	2.935	0.2075	1.05078
LUC7L	NM_201412	0.7675	3.61	1.04971
PLEKHG5	NM_020631	2.8325	0.7325	1.04963
MAOA	NM_000240	2.88	0.8825	1.04917
CCDC55	NM_032141	0.0075	4.26	1.04818
IVNS1ABP	NM_016389	1.5825	4.41	1.04694
MESDC1	NM_022566	3.0025	1.245	1.0453
MKI67IP	NM_032390	2.83	0.61	1.04442
UTP6	NM_018428	3.1125	1.515	1.04388
PLEKHG4	NM_015432	3.19	0.265	1.04166
FLJ22374	NM_032222	0.89	2.9825	1.03963
KRTAP80	NM_175857	2.8325	0.225	1.0393
KCNK10	NM_138318	2	3.175	1.03881
C18orf37	NM_194281	3.0475	1.385	1.03717
ZNF300	NM_052860	2.715	0.8375	1.03211
NA	NM_175870	2.265	2.3825	1.03122
PC	NM_022172	0.535	3.2325	1.03088
TRFP	NM_004275	3.2725	2.3125	1.03003
RORA	NM_134260	0.835	3.0625	1.02934
PDZD8	NM_173791	3.1275	2.3	1.02907
BCAS2	NM_005872	2.26	2.4325	1.02812
SLC37A2	NM_198277	0.22	3.8475	1.02559
ZC3H10	NM_032786	3.3475	0.635	1.02555
CDKL5	NM_001037343	0	3.04	1.02498
DND1	NM_194249	1.6425	3.7825	1.02481
TMEM97	NM_014573	2.17	2.4	1.02468
USMG5	NM_032747	2.3	2.4	1.02391
TAPBPL	NM_018009	2.1525	2.07	1.0207
HIST1H2AB	NM_003513	2.5675	3.8	1.0192
ESRRG	NM_206595	3.4325	1.51	1.01769
ZNF142	NM_005081	1.6975	4.5075	1.01658
TGFBR1	NM_004612	2.1425	3.21	1.01438
C20orf121	NM_024331	3.865	0.73	1.01153
BCL11B	NM_138576	3.44	0.4075	1.00727
ZNF569	NM_152484	2.2275	2.5225	1.00709
ZNF480	NM_144684	3.6725	0.2825	1.00633
TSLP	NM_138551	1.6425	3.155	1.00489
FAM54A	NM_138419	2.2125	2.665	1.00441
MPP7	NM_173496	2.3525	2.1975	1.00402
KCNJ1	NM_000220	1.6625	4.275	1.00395
TEAD4	NM_201443	2.7275	4.0825	1.00394
TGFBI	NM_000358	3.145	1.395	1.00286
ACTG2	NM_001615	0.395	3.1325	1.00197
MET	NM_000245	3.51	0.6825	0.998668
CACNA1B	NM_000718	2.6575	1	0.997847
DGKZ	NM_003646	2.9375	2.16	0.996851
CCNH	NM_001239	3.24	0.3	0.994768
DSU	NM_018000	2.24	2.8375	0.994288
CLN6	NM_017882	2.9825	0.4575	0.991766
PCDH19	NM_020766	0.7175	3.6025	0.990954
C14orf143	NM_145231	1.51	3.2475	0.990284
FLRT2	NM_013231	2.6625	1.13	0.988845
AOC3	NM_003734	2.68	1.5125	0.988783
H2AFX	NM_002105	2.8425	0.615	0.988073
CRYZ	NM_001889	2.8775	0.325	0.986637
PACAP	NM_016459	0.3775	3.0825	0.986545
S1	NM_000620	3.38	2.8175	0.980611
ACIN1	NM_014977	1.7425	3.0625	0.980014
RBMXL1	NM_019610	2.6	2.5575	0.97717
FLJ30934	NM_152760	2.695	0.7275	0.975022
MRPS31	NM_005830	2.6475	1.4825	0.97365
TNPO2	NM_013433	2.8525	0.265	0.971953
ZNF528	NM_032423	2.495	2.34	0.971599
TTF2	NM_003594	3.4175	0.7725	0.97124
C3orf26	NM_032359	3.4175	1.475	0.968942
HOXC10	NM_017409	2.3875	2.14	0.968195
SCD	NM_005063	3.4625	0.8	0.967578
KRCC1	NM_016618	3.1225	0.8925	0.966095
SUPV3L1	NM_003171	3.035	0.52	0.964624
BSPRY	NM_017688	2.8075	0.9975	0.958269
MGC42090	NM_152774	1.3975	4.425	0.95769
MYCL1	NM_005376	0.1325	3.01	0.954914
CHRNB1	NM_000747	0.9325	3.0475	0.954667
DNAL1	NM_031427	2.8125	0.305	0.954349
FLVCR	NM_014053	0.435	3.995	0.951947
PAX4	NM_006193	1.46	4.185	0.947931
CD68	NM_001251	3.255	0.6025	0.947482
PLAUR	NM_002659	2.7425	1.2875	0.947107
VILL	NM_015873	2.5875	3	0.943222
TAPBP	NM_172209	3.1	1.41	0.942754
TG	NM_003235	1.53	3.9125	0.942554
LOC197322	NM_174917	0.435	3.145	0.94015
AGXT2	NM_031900	0.3275	3.0675	0.93988
CENPK	NM_022145	2.285	4.1225	0.93985
TUBA1	NM_006000	1.48	3.605	0.939344
RBM19	NM_016196	3.6875	2.7725	0.937738
C20orf10	NM_014477	1.56	3.3375	0.937572
NYD0	NM_032597	2.715	0.455	0.937399
ELL2	NM_012081	0.35	3.525	0.93575
OAS3	NM_006187	0.59	3.365	0.934662
FGF13	NM_033642	1.3125	4.4175	0.931104
C1QTNF4	NM_031909	2.0175	3.6725	0.928646
SLC15A3	NM_016582	2.695	0.9275	0.927623
ANKFN1	NM_153228	2.6075	3.0175	0.92554
SPTBN2	NM_006946	4.385	2.3425	0.923401
RHCE	NM_138618	0.785	3.0275	0.922907
ATP5G3	NM_001689	2.915	2.2825	0.922788
GABRA5	NM_000810	2.8325	2.45	0.922769
CCR9	NM_006641	2.165	2.465	0.922138
FLJ10324	NM_018059	0.575	4.4575	0.918485
SPRY3	NM_005840	2.62	3.2375	0.917953
PNPT1	NM_033109	3.6275	0.1275	0.917824
WDR89	NM_080666	3.0525	0.4075	0.916888
PPP1R3F	NM_033215	3.61	0.6175	0.915502
AFF3	NM_002285	2.3775	4.0425	0.914705
GALNT10	NM_198321	2.9275	0.8325	0.913823
PEX12	NM_000286	1.4475	3.7475	0.910161
LIN9	NM_173083	0.5125	3.4975	0.908106
C6orf128	NM_145316	2.16	2.505	0.906909
ZNF117	NM_024498	0.5025	3.155	0.902706
EPB41L4B	NM_018424	3.1475	1.46	0.902016
CTHRC1	NM_138455	0.69	3.235	0.898582
7A5	NM_182762	0.37	3.5125	0.898324
RASIP1	NM_017805	1.04	3.415	0.88788
FLJ45983	NM_207423	1.685	3.2625	0.887584
OR5D16	NM_001005496	1.655	3.3225	0.885955
HS3ST4	NM_006040	2.6475	0.995	0.885367
UBL4B	NM_203412	2.8525	3.435	0.879115
RPS6KA5	NM_182398	2.9	1.4075	0.875391
PROK1	NM_032414	1.51	3.62	0.871775
PROX1	NM_002763	1.965	2.77	0.870545
ELP3	NM_018091	2.9275	0.175	0.870036
SP7	NM_152860	2.405	2.62	0.86983
SCLY	NM_016510	1.04	3.11	0.868993
SP8	NM_198956	2.92	1.2575	0.868615
OSR2	NM_053001	3.625	1.75	0.867206
C17orf70	NM_025161	2.935	0.6475	0.866461
PRICKLE2	NM_198859	3.0475	0.6425	0.863365
IL8RB	NM_001557	2.675	1.4675	0.859506
SCLT1	NM_144643	2.655	0.34	0.854968
C9orf65	NM_138818	1.2775	3.105	0.853174
CLCN4	NM_001830	0.5825	2.9575	0.849542
C14orf70	NM_001007560	0.98	2.965	0.848055
STIM2	NM_020860	3.17	0.41	0.846103
PTTG1	NM_004219	0.3825	3.09	0.845112
HMX2	NM_005519	0.92	3.31	0.841723
DLG2	NM_001364	3.1475	1.6525	0.839258
TEK	NM_000459	0.2275	3.2925	0.835484
TEX13B	NM_031273	0.0475	4.15	0.835425
LNX1	NM_032622	2.2125	3.57	0.833623
BAZ2A	NM_013449	2.7875	2.1875	0.830257
ASAH2	NM_019893	2.99	2.515	0.82885
CBWD3	NM_201453	2.9675	0.1375	0.825368
SULT1C1	NM_176825	3.355	1.605	0.824689
CAV3	NM_033337	0.2075	3.54	0.820821
C18orf54	NM_173529	2.84	0.2925	0.820708
PERLD1	NM_033419	0.16	4.23	0.820684
KRTAP130	NM_181600	1.2525	3.0625	0.81828
PRAM1	NM_032152	0.7575	3.59	0.815597
GIMAP5	NM_018384	2.7925	1.7025	0.815463
HCRTR2	NM_001526	0.475	3.5675	0.813894
IL2RG	NM_000206	2.3175	2.7925	0.813359
GREM2	NM_022469	2.9525	0.115	0.811924
ITLN2	NM_080878	0	3.8475	0.811475
HRH2	NM_022304	2.3625	2.915	0.80798
RFX4	NM_002920	1.455	3.725	0.804551
TCP10L2	NM_001013683	3.135	1.735	0.804544
OR52K2	NM_001005172	1.485	4.0875	0.800432
PDE4DIP	NM_022359	2.2875	3.3975	0.800396
CLDN17	NM_012131	0.4575	3.245	0.793404
HOXB3	NM_002146	3.0825	1.8	0.791317
LOC389607	NM_001013651	3.015	0.32	0.791167
GFOD1	NM_018988	2.695	0.9125	0.789752
TIAF1	NM_004740	0.335	3.68	0.781815
STX2	NM_194356	2.835	0.395	0.780332
QPCT	NM_012413	1.9525	2.2875	0.77677
C8orf17	NM_020237	2.65	1.1	0.752613
IGSF2	NM_004258	0.02	3.4425	0.749818
SCN10A	NM_006514	0.3675	3.28	0.740683
PLUNC	NM_130852	2.2575	3.725	0.737108
RP110	NM_001012977	0.92	3.0825	0.735496
C22orf23	NM_032561	1.2075	2.96	0.734033
CHAT	NM_020549	0.4475	3.7375	0.726046
ADAMTS4	NM_005099	1.3275	3.3275	0.724499
LOC388915	NM_001010902	0.915	3.9275	0.721851
CD300C	NM_006678	2.6125	2.56	0.720419
CENPI	NM_006733	2.7875	0.705	0.718429
USP2	NM_004205	2.9175	5.105	0.705983
OR52E4	NM_001005165	0.08	3.185	0.701115
SCGB1D1	NM_006552	0.95	3.1975	0.699538
OR52I1	NM_001005169	0.4325	3.625	0.6951
PRAMEF1	NM_023013	1.465	3.62	0.688711
LY9	NM_002348	1.5775	4.5375	0.687975
RIMBP2	NM_015347	2.1075	3.7375	0.686721
PPP1R1A	NM_006741	2.955	0.615	0.678014
FGF14	NM_175929	3.025	0.7725	0.675785
ZNF141	NM_003441	2.21	2.8975	0.675096
LRRC28	NM_144598	2.775	1.2725	0.673206
KLRG1	NM_005810	1.4425	3.185	0.663098
ANGPTL1	NM_004673	1.7125	3.4975	0.659111
KRT77	NM_175078	1.4425	3.245	0.656448
CAPN13	NM_144575	2.015	2.1675	0.652324
OLFML1	NM_198474	3.165	2.96	0.649962
PAEP	NM_002571	1.69	3.7325	0.649771
MBL2	NM_000242	0	3.3925	0.648501
GFRA2	NM_001495	2.825	0.5275	0.644009
CXorf57	NM_018015	2.305	2.62	0.636823
BTK	NM_000061	0.065	3.3425	0.632783
C14orf148	NM_138791	1.3225	3.3	0.632539
LIM2	NM_030657	2.185	1.215	0.628821
SPATA5L1	NM_024063	2.685	2.815	0.627508
RBM35B	NM_024939	1.4475	3.0425	0.625238
UGT1A3	NM_019093	1.2075	3.9525	0.624156
ALOX15	NM_001140	2.6975	2.615	0.622948
TMEM139	NM_153345	0.16	3.16	0.61915
NA	NM_207484	0.84	5.335	0.601241
OR10H1	NM_013940	2.015	2.67	0.601019
VGCNL1	NM_052867	0.7075	2.9775	0.600321
ERV3	NM_001007253	1.7925	3.435	0.595086
LOC387856	NM_001013635	2.8625	0.4075	0.591697
C14orf83	NM_182526	2.1225	2.4225	0.5893
LRRC2	NM_024750	0.7075	3.1525	0.582247
SPANX0	NM_001009613	2.2575	2.5925	0.575108
CALN1	NM_031468	2.8025	1.37	0.568425
GIMAP7	NM_153236	2.0175	2.215	0.544849
MLN	NM_002418	1.9775	2.92	0.526398
C1orf180	NM_001033660	0.7175	3.135	0.519474
LRAT	NM_004744	2.9375	0.51	0.513563
PRIMA1	NM_178013	2.025	2.9175	0.509257
TUBA8	NM_018943	0.3525	3.4425	0.506574
C20orf132	NM_213632	0	3.7125	0.496904
C12orf42	NM_198521	0.2175	3.245	0.475803
ADAMTS17	NM_139057	2.96	1.3675	0.468632
OR2M4	NM_017504	2.19	2.4025	0.467374
KCNAB1	NM_172159	0.6275	3.235	0.453715
TSPYL5	NM_033512	0.5525	2.98	0.447463
SPACA1	NM_030960	0.615	3.01	0.437777
NA	NM_001006603	0.6125	3.125	0.434945
FCN2	NM_015837	2.5175	4.69	0.434807
ATRNL1	NM_207303	0.665	4.0625	0.42345
BZRPL1	NM_001010873	0.6075	3.0475	0.408918
ECE2	NM_001037324	2.395	3.6625	0.396219
IL17F	NM_052872	2.0275	2.445	0.385877
ART1	NM_004314	2.0775	2.215	0.37271
TMPRSS12	NM_182559	1.76	3	0.370728
CEACAM4	NM_001817	1.13	3.275	0.369653
CST1	NM_001898	1.3875	4.2	0.340724
KRT33B	NM_002279	0.045	2.9625	0.339153
TRAPPC6B	NM_177452	3.3075	1.16	0.330148
VTN	NM_000638	1.6475	3.14	0.319226
SLC9A10	NM_183061	0.8575	3.28	0.311342
OR52A5	NM_001005160	1.71	3.5925	0.302008
LGICZ1	NM_180990	2.815	1.325	0.296167
PTPN20B	NM_015605	0.54	3.4425	0.285596
OR2T6	NM_001005471	0.4675	3.3725	0.285188
CDC5L	NM_001253	3.3925	0.105	0.281685
OR8D1	NM_001002917	1.3825	4.0425	0.263235
DMD	NM_004010	1.99	2.67	0.260036
FLJ46020	NM_207472	3.66	0.21	0.247578
METT5D1	NM_152636	2.845	0.38	0.239323
RARRES1	NM_002888	2.6575	0.6075	0.220709
ZNF366	NM_152625	0.7625	3.4975	0.217861
RFXDC1	NM_173560	0.505	3.225	0.205088
ACSS2	NM_018677	4.0125	0.595	0.171755
WNT9B	NM_003396	0.675	3.2275	0.171278
TREML1	NM_178174	1.4225	3.0375	0.153907
KCNK12	NM_022055	0.52	3.36	0.140424
NA	NM_207449	3.18	1.7625	0.133328
SERPINA7	NM_000354	0.2875	3.5075	0.118357
PALM2	NM_001037293	0.185	3.105	0.101971
CFTR	NM_000492	1.425	3.72	0.0977667
CDH7	NM_004361	0.83	3.2375	0.0930461
HSD17B2	NM_002153	1.255	3.845	0.0713057
KLRC4	NM_013431	0	3.73	0.0586012
LOC338797	NM_001025466	1.595	3.8625	0.0475591
LTB4R2	NM_019839	2.2325	2.3175	0.0391459
OR51I2	NM_001004754	3.4525	1.4125	0
